# Supplementary material for: Diversity of Metabolically Active Bacteria in Water-Flooded High-Temperature Heavy Oil Reservoir
Source: PubMed Central journal article supplement (PMC5403907; doi:10.3389/fmicb.2017.00707), 2017-04-25
Supplement: DataSheet1.pdf [file DataSheet1.pdf]

# Metabolically active oilfield bacteria

## *Supplementary Material*

### **Diversity of metabolically active *Bacteria* in water-flooded high-temperature heavy oil reservoir**

**Tamara N. Nazina<sup>\*</sup>, Natalya M. Shestakova, Ekaterina M. Semenova, Alena V. Korshunova, Nadezda K. Kostrukova, Tatiana P. Tourova, Liu Min, Qingxian Feng, and Andrey B. Poltarau**

<sup>1</sup> *Laboratory of Petroleum Microbiology, Winogradsky Institute of Microbiology, Research Center of Biotechnology, Russian Academy of Sciences, Moscow, Russia*

<sup>2</sup> *Dagang Oil Field Group Ltd., Tianjin, China*

<sup>3</sup> *Engelhardt Institute of Molecular Biology, Russian Academy of Sciences, Moscow, Russia*

\* Correspondence: Tamara N. Nazina, Laboratory of Petroleum Microbiology, Winogradsky Institute of Microbiology, Research Center of Biotechnology, Russian Academy of Sciences, Prospect 60-Letiya Oktyabryua, 7/2, 117312 Moscow, Russia. Tel.: +7-499-135-03-41  
e-mail: nazina@inmi.ru

## **Supplementary tables**

**Supplementary Table S1.** Density, viscosity, wax and colloidal asphaltene content of oil from production well 1002-1 at the Kongdian bed of the Dagang oilfield in the course of the pilot trial.

| Parameter                  | Year, month |         |         |         |         |         |
|----------------------------|-------------|---------|---------|---------|---------|---------|
|                            | 2001.03     | 2001.08 | 2002.04 | 2002.11 | 2003.04 | 2003.09 |
| Viscosity, mPa.s           | 501.2       | 496.5   | 458.9   | 459.1   | 470.3   | 465     |
| Density, g/cm <sup>3</sup> | 0.9549      | 0.9547  | 0.9459  | 0.9462  | 0.9528  |         |
| Wax content, %             | 6.64        | 6.54    | 6.48    |         |         | 4.72    |
| Colloidal asphaltene, %    | 41.05       | 39.81   | 37.21   |         |         | 38.88   |

**Supplementary Table S2.** Phylogenetic diversity of 16S rRNA genes of *Archaea* and *Bacteria* and *alkB* genes detected in the DNA-derived clone libraries of microorganisms of back-flushed water from the near-bottom zone of injection well 1098, sample 8 m<sup>3</sup> (December 2006).

| Superkingdom, phylogenetic group                                                                              | Representative clone of the phylotype | GenBank accession number | Number of related clones | Closest cultivable relative or clone, acc. no.                                              | Sequence identity, % | Temperature minimum-optimum-maximum, °C |
|---------------------------------------------------------------------------------------------------------------|---------------------------------------|--------------------------|--------------------------|---------------------------------------------------------------------------------------------|----------------------|-----------------------------------------|
| <b>Archaea</b>                                                                                                |                                       |                          |                          |                                                                                             |                      |                                         |
| <b>DNA-based clone library of 16S rRNA genes (primers A109F and A1041r, DA library)</b>                       |                                       |                          |                          |                                                                                             |                      |                                         |
| <i>Methanosarcinales</i>                                                                                      | da-93                                 | KY273934                 | 44                       | <i>Methanomethylovorans thermophila</i> L2FAW <sup>T</sup> , AY672821                       | 99                   | 42–50–58                                |
|                                                                                                               | da-38                                 | KY273933                 | 7                        | <i>Methanotherix soehngenii</i> (= " <i>Methanosaeta thermophila</i> " DSM 4774T, LN868388) | 99                   | Nd* –55(60)–70                          |
| <i>Methanomicrobiales</i>                                                                                     | da-84                                 | KY273930                 | 36                       | <i>Methanoculleus receptaculi</i> ZC-2 <sup>T</sup> , DQ787476                              | 99                   | 30–50(55)–65                            |
|                                                                                                               | da-66                                 | KY273932                 | 16                       | <i>Methanolinea tarda</i> NOBI-1 <sup>T</sup> , AB162774                                    | 99                   | 35–50–55                                |
|                                                                                                               | da-37                                 | KY273929                 | 7                        | <i>Methanocalculus pumilus</i> MHT-1 <sup>T</sup> , AB008853                                | 100                  | 25–35–45                                |
|                                                                                                               | da-2                                  | KY273931                 | 1                        | <i>Methanoregula formicica</i> SMSP <sup>T</sup> , AB479390                                 | 97                   | 10–30(33)–40                            |
| <i>Methanococcales</i>                                                                                        | da-70                                 | KY273937                 | 1                        | <i>Methanococcus maripaludis</i> C7, CP000745                                               | 99                   | 18–38–47                                |
| <i>Methanomassiliicoccales</i>                                                                                | da-101                                | KY273935                 | 1                        | <i>Methanomassiliicoccus luminyensis</i> B10 <sup>T</sup> , NZ_CAJE01000013                 | 92                   | 25–37–45                                |
| <i>Thermococcales</i>                                                                                         | da-69                                 | KY273936                 | 1                        | <i>Thermococcus litoralis</i> DSM 5474, AY099180                                            | 99                   | 55–85–100                               |
| <i>Crenarchaeota</i>                                                                                          | da-109                                | KY273938                 | 1                        | Uncultured archaeon clone GR-WP33-A11, AJ583414                                             | 98                   |                                         |
| The number of clones in the library                                                                           |                                       |                          | 115                      |                                                                                             |                      |                                         |
| <b>Bacteria</b>                                                                                               |                                       |                          |                          |                                                                                             |                      |                                         |
| <b>DNA-based clone library of 16S rRNA genes 1098-8m<sup>3</sup>-(1) (primers 8-27f and 519r, DB library)</b> |                                       |                          |                          |                                                                                             |                      |                                         |
| <i>Bacilli</i>                                                                                                | db5-70                                | KY273989                 | 100                      | <i>Geobacillus subterraneus</i> 34 <sup>T</sup> , AF276306                                  | 99                   | 45–60–65                                |
| <i>Clostridia</i>                                                                                             | db5-51                                | KY273991                 | 1                        | <i>Thermaerobacter nagasakiensis</i> JCM 11223, AB061441                                    | 99                   | 52 – 70 –78                             |
|                                                                                                               | db5-61                                | KY273990                 | 2                        | Uncultured bacterium clone OF-140, KP109903                                                 | 99                   |                                         |

|                         |         |          |   |                                                                              |    |                     |
|-------------------------|---------|----------|---|------------------------------------------------------------------------------|----|---------------------|
| <i>Tissierellia</i>     | db5-12  | KY273992 | 1 | <i>Soehngenia saccharolytica</i> BOR-Y <sup>T</sup> ,<br>AY353956            | 99 | 15 – 30(37) –<br>40 |
| <i>γ-Proteobacteria</i> | db1-9   | KY273974 | 1 | <i>Cedecea davisae</i> NBRC 105702 <sup>T</sup> , AB682275                   | 99 | 15 – 35–37          |
|                         | db1-89  | KY273975 | 9 | <i>Pseudomonas poae</i> RE*1-1-14, NR_102514                                 | 99 |                     |
|                         | db5-48  | KY273973 | 1 | <i>Thiofaba tepidiphila</i> DSM 19618, AB304258                              | 96 | 20–45–51            |
| <i>β-Proteobacteria</i> | db5-113 | KY273996 | 1 | <i>Tepidimonas fonticaldi</i> AT-A2 <sup>T</sup> , JN713899                  | 99 | 35 – 55 – 60        |
|                         | db1-5   | KY273972 | 3 | <i>Hydrogenophilus thermoluteolus</i> strain NBRC<br>14978, NR_113716        | 99 | ND – 52 – ND        |
|                         | db1-2   | KY273969 | 1 | <i>Thauera aminoaromatica</i> S2,<br>NZ_AMXD01000247                         | 93 | 4 – 28 – 40         |
|                         | db5-76  | KY273971 | 1 | <i>Georgfuchsia toluolica</i> strain G5G6,<br>NR_115995                      | 93 |                     |
|                         | db5-103 | KY273970 | 1 | <i>Azospira</i> sp. AK33, HF562218                                           | 99 |                     |
| <i>δ-Proteobacteria</i> | db1-95  | KY273978 | 2 | <i>Syntrophobacter fumaroxidans</i> MPOB <sup>T</sup> ,<br>NC_008554         | 92 | 20 – 37 – 40        |
|                         | db1-3   | KY273976 | 1 | <i>Desulfurivibrio alkaliphilus</i> AHT2 <sup>T</sup> , EF422413             | 93 | Nd – 30 –42         |
|                         | db5-24  | KY273977 | 1 | <i>Desulfomicrobium thermophilum</i> P6.2,<br>AY464939                       | 94 | 37–55–60            |
|                         | db1-47  | KY273997 | 1 | <i>Geoalkalibacter ferrihydriticus</i> DSM 17813 <sup>T</sup> ,<br>NR_043709 | 95 | 18 – 35 –40         |
| <i>Thermotogae</i>      | db1-36  | KY273979 | 4 | <i>Thermosipho geolei</i> strain DSM 13256,<br>NR_025389                     | 99 |                     |
|                         | db5-82  | KY273980 | 3 | <i>Fervidobacterium pennivorans</i> DSM 9078 <sup>T</sup> ,<br>NC_017095     | 98 | 50–70–80            |
|                         | db1-88  | KY273981 | 3 | <i>Mesotoga prima</i> DSM 24739 (T), NC_017934                               | 99 | 20–37–50            |
| <i>Deferribacteres</i>  | db5-80  | KY273994 | 3 | Uncultured bacterium clone Z-47, FJ901100                                    | 98 |                     |
| <i>Chloroflexi</i>      | db1-118 | KY273985 | 3 | <i>Bellilinea caldifistulae</i> GOMI-1 <sup>T</sup> , AB243672               | 90 | 45 – 55 – 65        |
| <i>Nitrospira</i>       | db5-94  | KY273983 | 1 | <i>Thermodesulfovibrio hydrogeniphilus</i> Hbr5,<br>EF081294                 | 95 | 50–75–80            |
| <i>Actinobacteria</i>   | db5-56  | KY273993 | 2 | Uncultured <i>Coriobacteriales</i> bacterium clone<br>OF-143, KP109904       | 99 |                     |
| <i>Bacteroidetes</i>    | db5-72  | KY273984 | 1 | Unidentified bacterium, strain OF1, EF148839                                 | 99 |                     |

|                                                                                                                |        |          |     |                                                                           |    |                 |
|----------------------------------------------------------------------------------------------------------------|--------|----------|-----|---------------------------------------------------------------------------|----|-----------------|
| <i>Elusimicrobia</i>                                                                                           | db1-11 | KY273982 | 1   | Uncultured <i>Elusimicrobium</i> sp. clone B30_116, KP258939              | 99 |                 |
| Uncultured bacteria                                                                                            | db5-75 | KY273986 | 1   | Uncultured OD1 bacterium clone SRC61, AY193293                            | 96 |                 |
|                                                                                                                | db1-45 | KY273995 | 1   | Candidate division JS1 bacterium enrichment culture clone B4118, HQ133192 | 99 |                 |
|                                                                                                                | db5-22 | KY273987 | 1   | Uncultured bacterium OP11 clone D004011B03, EU721757                      | 98 |                 |
|                                                                                                                | db5-25 | KY273988 | 2   | Uncultured bacterium clone PNG_Kap3_B354, JF935186                        | 98 |                 |
| The number of clones in the library                                                                            |        |          | 153 |                                                                           |    |                 |
| <b>DNA-based clone library of 16S rRNA genes 1098-8m<sup>3</sup>-(2) (primers Pla46f and 519r, DP library)</b> |        |          |     |                                                                           |    |                 |
| Candidate division <i>Cloacimonetes</i> (WWE1)                                                                 | dp-92  | KY273999 | 57  | Candidatus <i>Cloacamonas acidaminovorans</i> , CU466930                  | 99 |                 |
|                                                                                                                | dp-88  | KY273998 | 26  | Uncultured WWE1 bacterium clone QEDQ2AE08, CU923265                       | 98 |                 |
| <i>Planctomycetes</i>                                                                                          | dp-8   | KY274000 | 3   | <i>Thermogutta terrifontis</i> R1 <sup>T</sup> , KC867694                 | 90 | 25 – 55/67 – 67 |
| <i>Lentisphaerae</i>                                                                                           | dp-97  | KY274001 | 3   | <i>Victivallis vadensis</i> ATCC BAA-548 <sup>T</sup> , AY049713          | 84 | 20 – 37 – 40    |
| The number of clones in the library                                                                            |        |          | 89  |                                                                           |    |                 |
| <b>DNA-based clone library of <i>alkB</i> genes (primers Alk-BFB and Alk-BRB)</b>                              |        |          |     |                                                                           |    |                 |
|                                                                                                                | k8-10  | KY273967 | 22  | <i>Geobacillus</i> sp. <i>alkB-geo1</i> , EF534176                        | 99 |                 |
|                                                                                                                | k8-16  | KY273968 | 5   | <i>Geobacillus</i> sp. <i>alkB-geo6</i> , EF534175                        | 98 |                 |
|                                                                                                                | k8-2   | KY273966 | 16  | Uncultured bacterium clone P3E03_GMR                                      | 98 |                 |
| The number of clones in the library                                                                            |        |          | 43  |                                                                           |    |                 |

\* No data.

**Supplementary Table S3.** Phylogenetic diversity of cDNA of 16S rRNA sequences of *Bacteria* detected in the RNA-derived clone library of microorganisms of back-flushed water from the near-bottom zone of injection well 1098, sample 8 m<sup>3</sup> (RB library) (December 2006).

| Phylogenetic group      | Representative clone of the phylotype | GenBank accession number | Number of related clones | Closest cultivable relative or clone, acc. no.                           | Sequence identity, % | Temperature minimum-optimum-maximum, °C |
|-------------------------|---------------------------------------|--------------------------|--------------------------|--------------------------------------------------------------------------|----------------------|-----------------------------------------|
| <i>β-Proteobacteria</i> | r8-221                                | KY273943                 | 36                       | <i>Tepidimonas fonticaldi</i> AT-A2 <sup>T</sup> , JN713899              | 100                  | 35 – 55 – 60                            |
|                         | r8-191                                | KY273941                 | 44                       | <i>Thauera aminoaromatica</i> S2 <sup>T</sup> , AMXD01000247             | 92                   | 4 – 28 – 40                             |
|                         | r8-125                                | KY273940                 | 5                        | <i>Azoarcus tolulyticus</i> 2FB6, AF229861                               | 95                   | 25–ND--37                               |
|                         | r8-28                                 | KY273939                 | 2                        | <i>Denitromonas indolicum</i> strain MPKc, AY972852                      | 94                   |                                         |
|                         | r8-12                                 | KY273942                 | 2                        | <i>Tepidiphilus margaritifera</i> strain N2-214, NR_025556               | 99                   | 25 – 50 – 61                            |
| <i>δ-Proteobacteria</i> | r8-210                                | KY273951                 | 5                        | <i>Desulfomicrobium thermophilum</i> P6.2 <sup>T</sup> , AY464939        | 99                   | 37 – 55 – 60                            |
|                         | r8-264                                | KY273949                 | 3                        | <i>Geobacter hydrogenophilus</i> H2 <sup>T</sup> , U28173                | 97                   | ND – 35 – ND                            |
|                         | r8-254                                | KY273948                 | 2                        | <i>Desulfuromonas michiganensis</i> BB1 <sup>T</sup> , AF357915          | 96                   | 10 – 25(30) – ND                        |
|                         | r8-140                                | KY273947                 | 10                       | Uncultured bacterium clone Phox-21, KU898264                             | 99                   |                                         |
|                         | r8-265                                | KY273950                 | 1                        | <i>Desulfurivibrio alkaliphilus</i> AHT2 <sup>T</sup> , NC_014216        | 92                   | Nd – 30 – 42                            |
|                         | r8-35                                 | KY273953                 | 1                        | <i>Desulfatitalea tepidiphila</i> S28bF <sup>T</sup> , AB614135          | 90                   | 13 – 34(42) – 45                        |
|                         | r8-153                                | KY273952                 | 1                        | <i>Smithella propionica</i> LYP <sup>T</sup> , AF126282                  | 88                   | 25 – 35(37) – 37                        |
| <i>γ-Proteobacteria</i> | r8-4                                  | KY273944                 | 4                        | <i>Thiofaba tepidiphila</i> BDA453 <sup>T</sup> , AB304258               | 99                   | 20 – 45 – 51                            |
|                         | r8-216                                | KY273946                 | 2                        | <i>Pseudomonas poae</i> RE*1-1-14, NR_102514                             | 99                   | 5 – 25(30) – 37                         |
|                         | r8-151                                | KY273945                 | 1                        | <i>Acinetobacter johnsonii</i> A13, KT767653                             | 99                   | 15 – 30 – 37                            |
| <i>Deferribacteres</i>  | r8-26                                 | KY273964                 | 10                       | <i>Flexistipes</i> sp. vp.180, AF220344                                  | 91                   | 30 – 46 – 53                            |
|                         | r8-229                                | KY273963                 | 6                        | <i>Calditerrivibrio nitroreducens</i> DSM 19672 <sup>T</sup> , NC_014758 | 99                   | 30 – 55 – 65                            |
| <i>Bacteroidetes</i>    | r8-134                                | KY273957                 | 6                        | <i>Fluviicola taffensis</i> DSM 16823 <sup>T</sup> , CP002542            | 86                   |                                         |
|                         | r8-204                                | KY273958                 | 1                        | Unidentified bacterium, strain OF1, EF148839                             | 99                   |                                         |
| <i>Chloroflexi</i>      | r8-238                                | KY273959                 | 2                        | <i>Bellilinea caldifistulae</i> GOMI-1, AB243672                         | 89                   |                                         |
|                         | r8-241                                | KY273960                 | 1                        | <i>Bellilinea caldifistulae</i> GOMI-1, AB243672                         | 99                   | 45 – 55 – 65                            |
| <i>Ignavibacteriae</i>  | r8-248                                | KY273956                 | 1                        | Uncultured bacterium clone TTMF57, AY741701                              | 96                   |                                         |
|                         | r8-5                                  | KY273955                 | 1                        | <i>Melioribacter roseus</i> strain P3M-2, NR_074796                      | 99                   | 37– 47 – 60                             |

|                                     |        |          |     |                                                              |    |  |
|-------------------------------------|--------|----------|-----|--------------------------------------------------------------|----|--|
| <i>Elusimicrobia</i>                | r8-133 | KY273954 | 1   | Uncultured <i>Elusimicrobium</i> sp. clone B30_116, KP258939 | 99 |  |
| Uncultured bacteria                 | r8-91  | KY273965 | 1   | Uncultured bacterium clone ARWH-BH02, AB546037               | 99 |  |
|                                     | r8-168 | KY273962 | 1   | Uncultured bacterium clone OTU-R02, FJ164077                 | 99 |  |
|                                     | r8-57  | KY273961 | 1   | Bacterium enrichment culture clone R4-11B, GU196193          | 97 |  |
| The number of clones in the library |        |          | 151 |                                                              |    |  |

# Metabolically active *Bacteria* in oilfields

## Supplementary figures

Supplementary Figure 1.

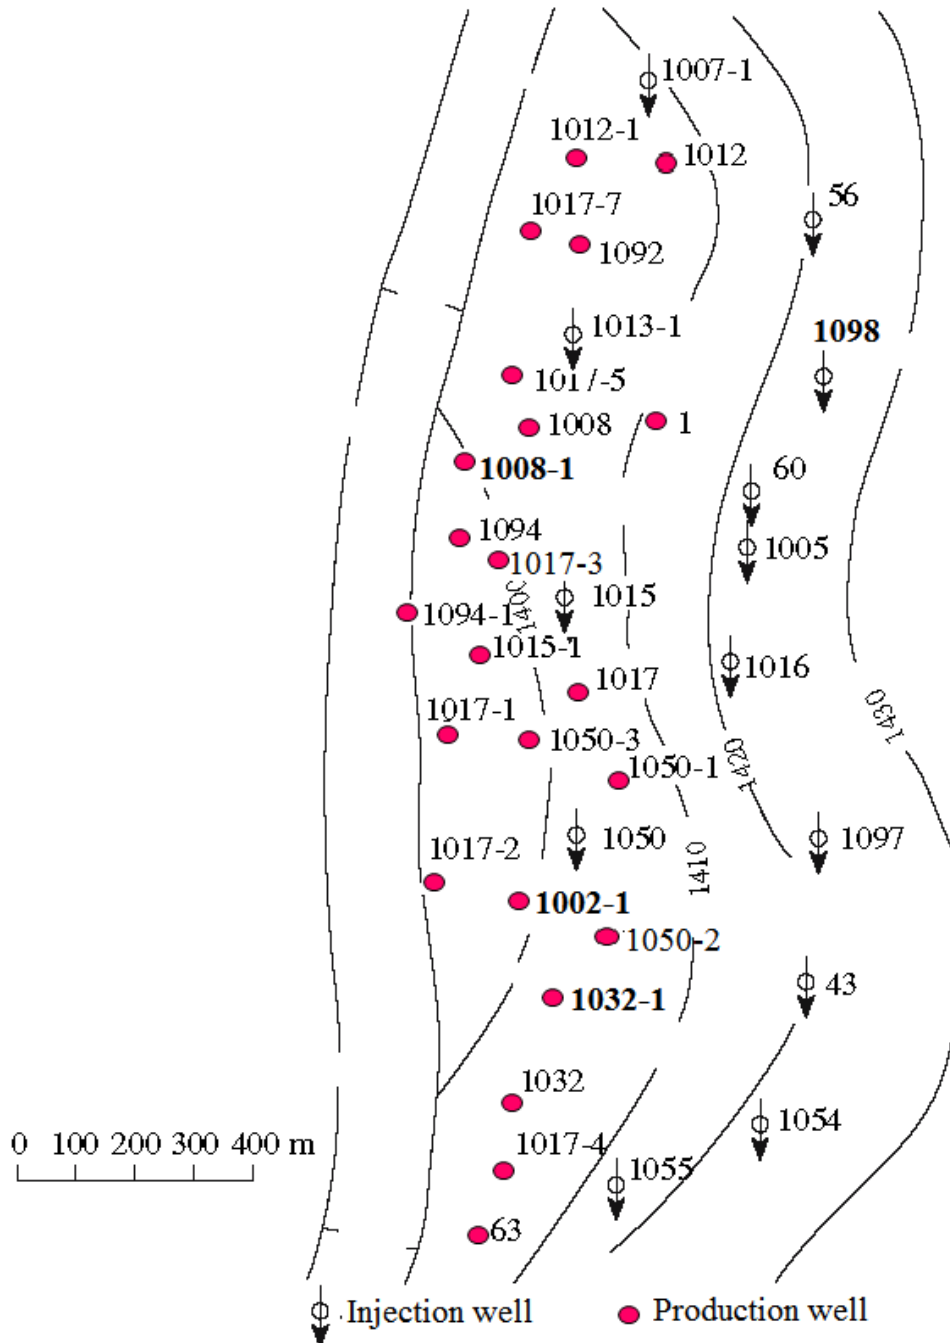

**Supplementary Figure S1.** Layout of the injection and production wells at the trial site of the Kongdian bed. The numbers of injection well 1098 and production wells 1002-1, 1008-1 and 1032-1 studied in this paper are in bold.

Supplementary Figure S2.

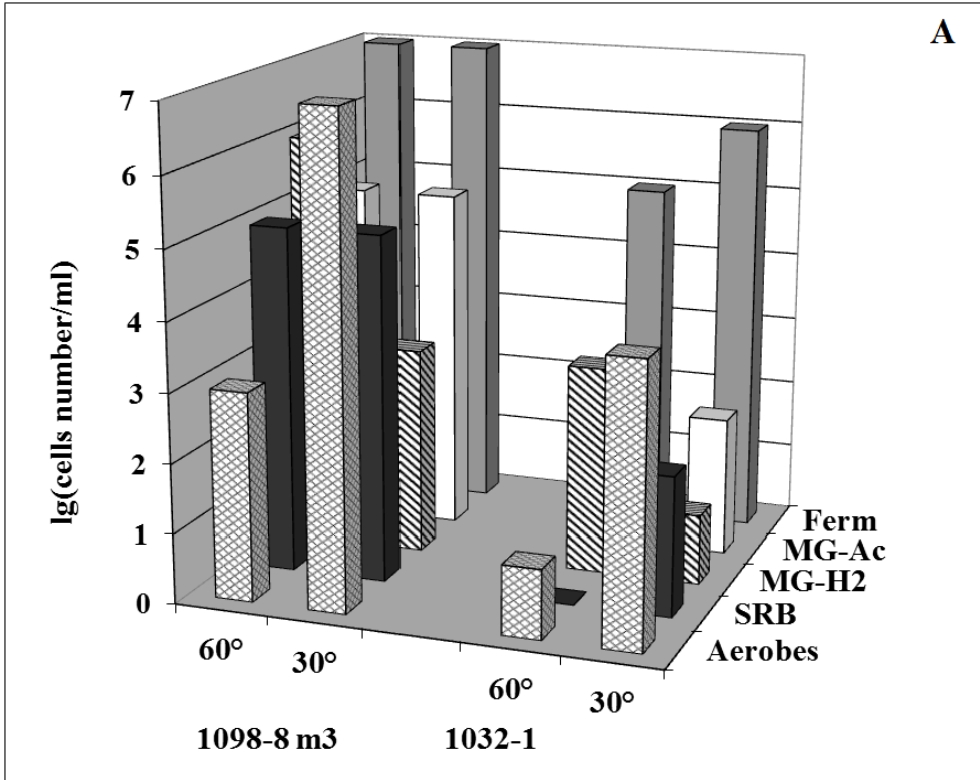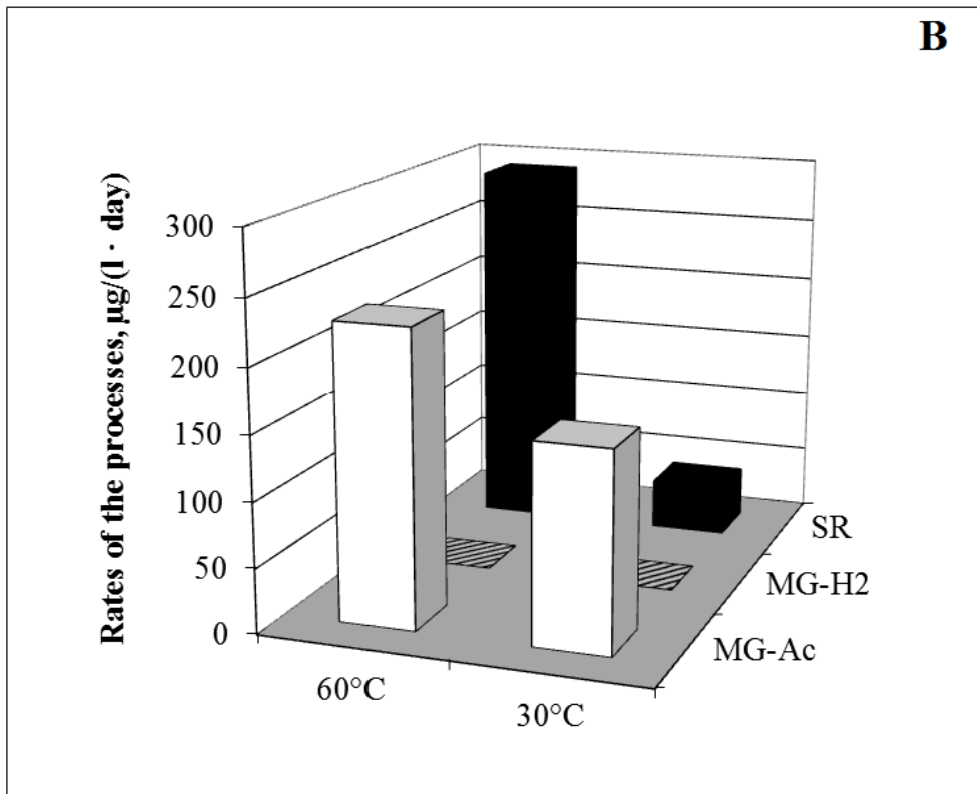



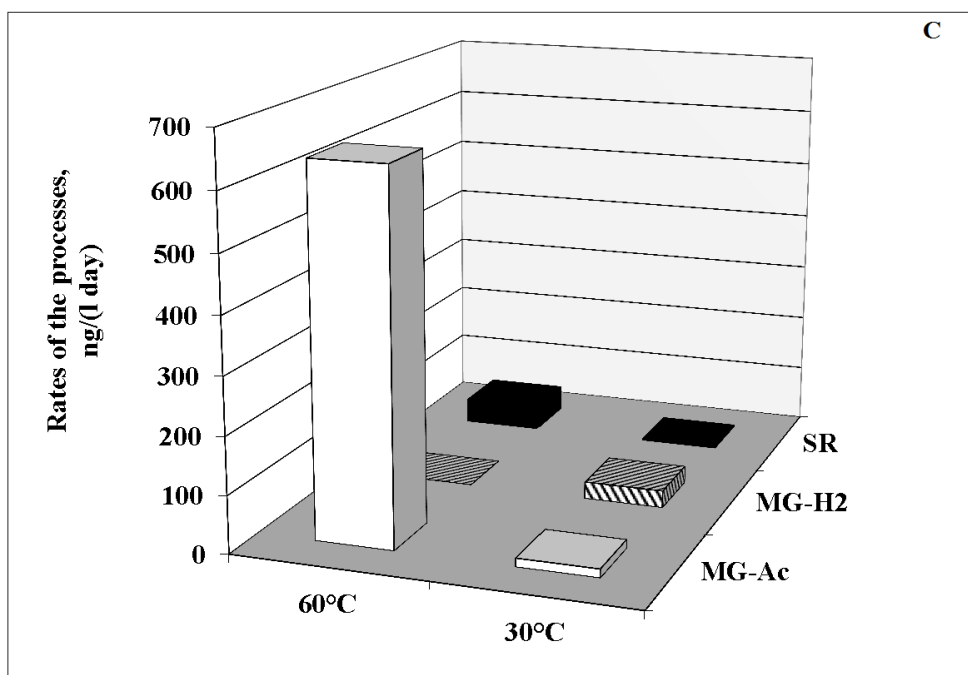

**Supplementary Figure S2.** Abundance of thermophilic and mesophilic aerobic organotrophs (Aerobes) and anaerobic fermenting (Ferm) and sulfate-reducing (SRB) bacteria and methanogens [in the medium with H<sub>2</sub>+CO<sub>2</sub> (MG-H2) and acetate (MG-Ac)] (A) and the rates of thermophilic and mesophilic sulfate reduction (SR) and methanogenesis from 2-<sup>14</sup>C-acetate (MG-Ac) and from NaH<sup>14</sup>CO<sub>3</sub> (MG-H2) in the water from the near-bottom zone of injection well 1098 (8 m<sup>3</sup>) (B) and from production well 1032-1 (C) (June 2002).

Supplementary Figure S3.

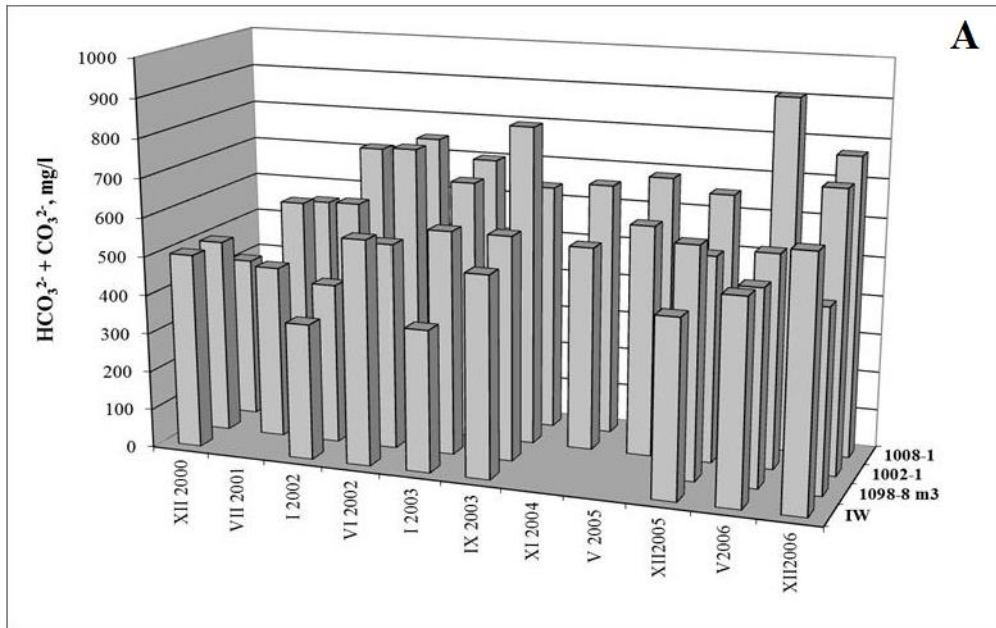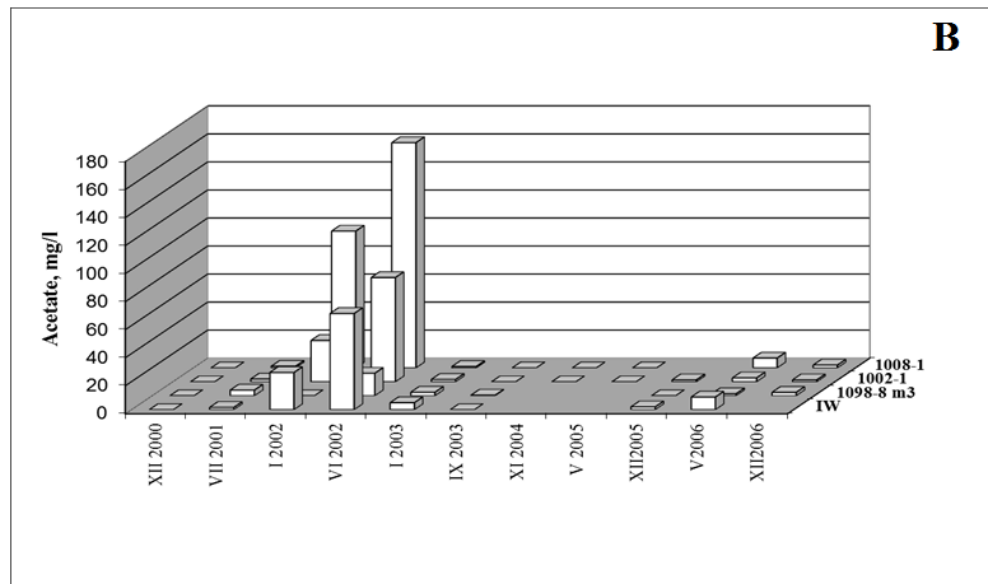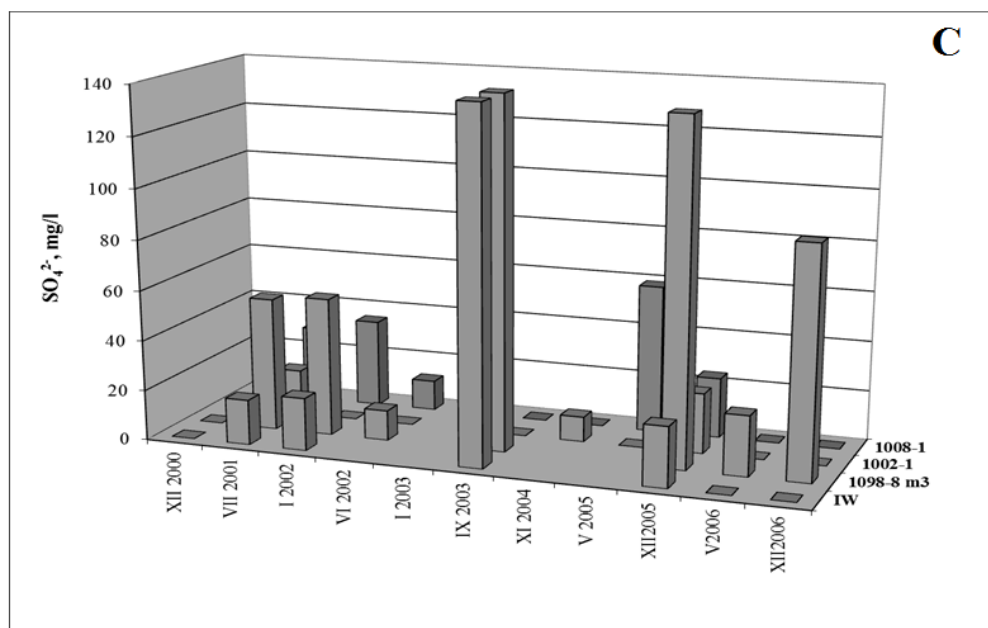

**Supplementary Figure S3.** Concentrations of mineral carbonates ( $\text{HCO}_3^- + \text{CO}_3^{2-}$ ) (A), acetate (B), and sulfate (C) in injection water (IW), in back-flushed water from near-bottom zone of injection well (1098-8 m<sup>3</sup>) and in water from production wells 1002-1 and 1008-1 of the Kongdian bed during the biotechnology trial.





(C)

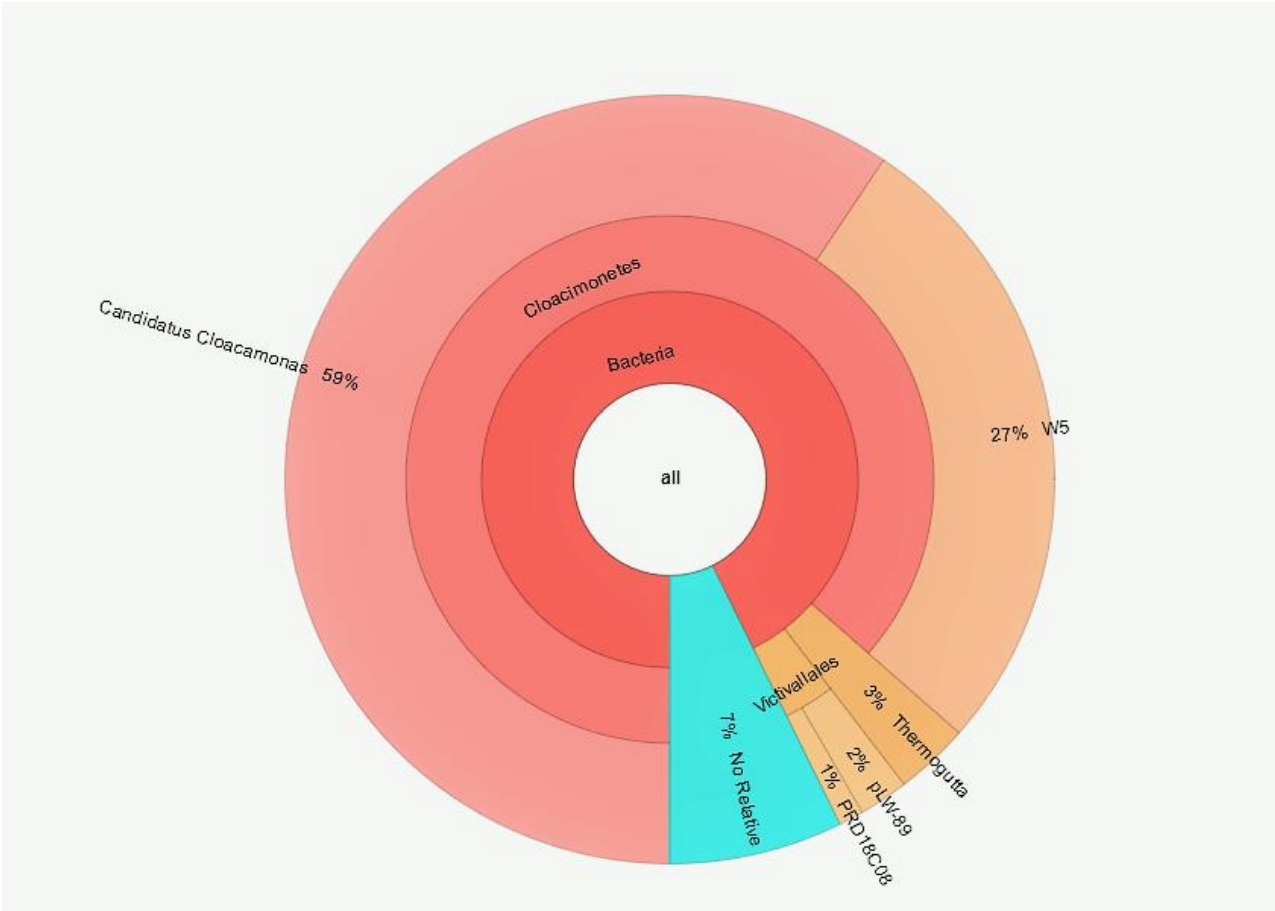

(D)

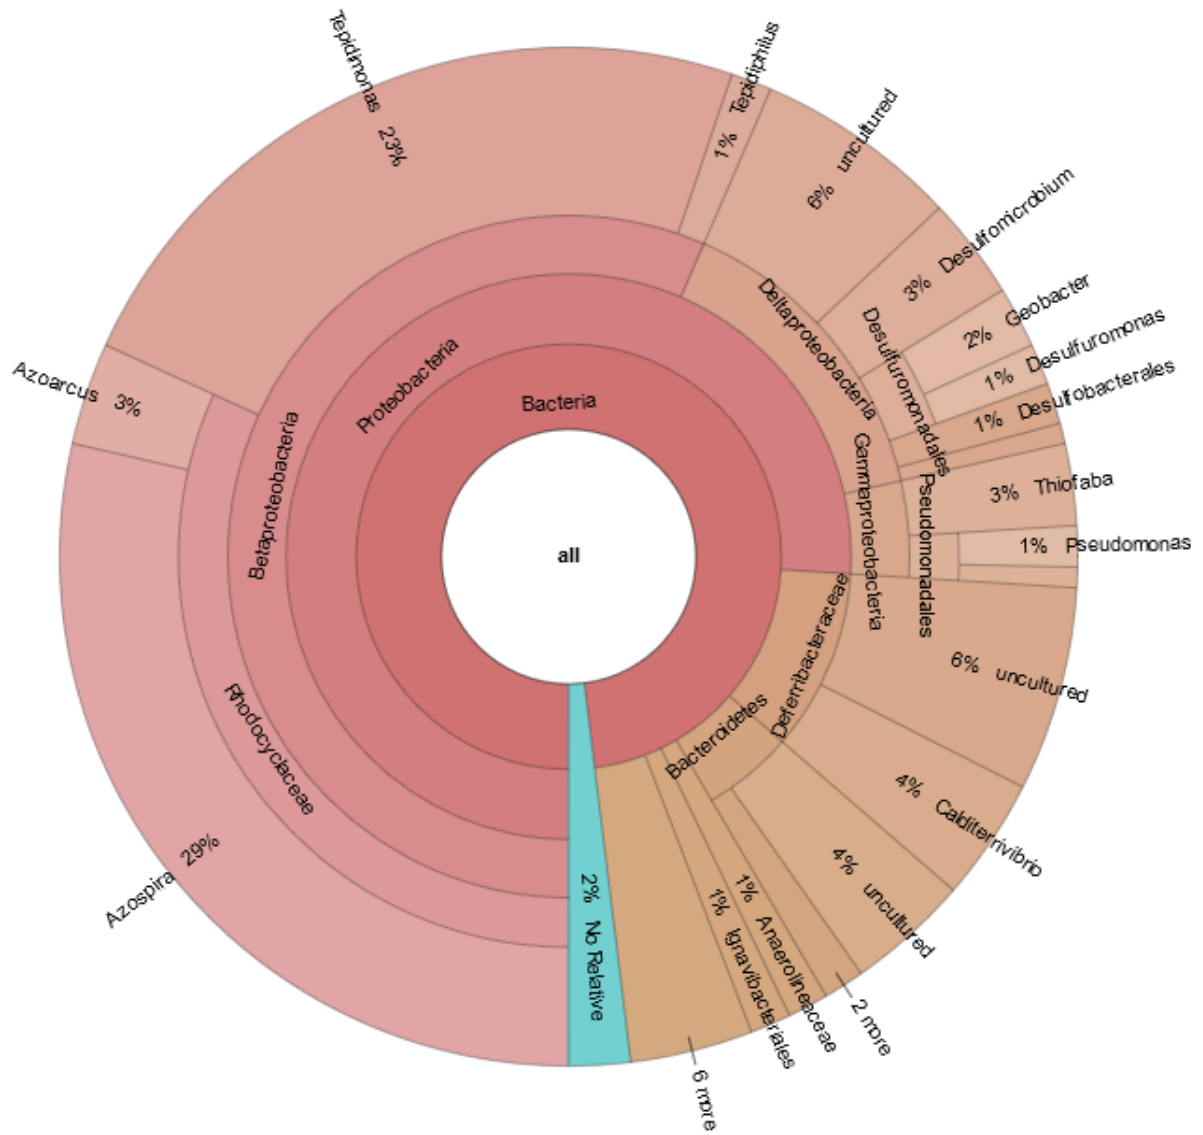

(E)

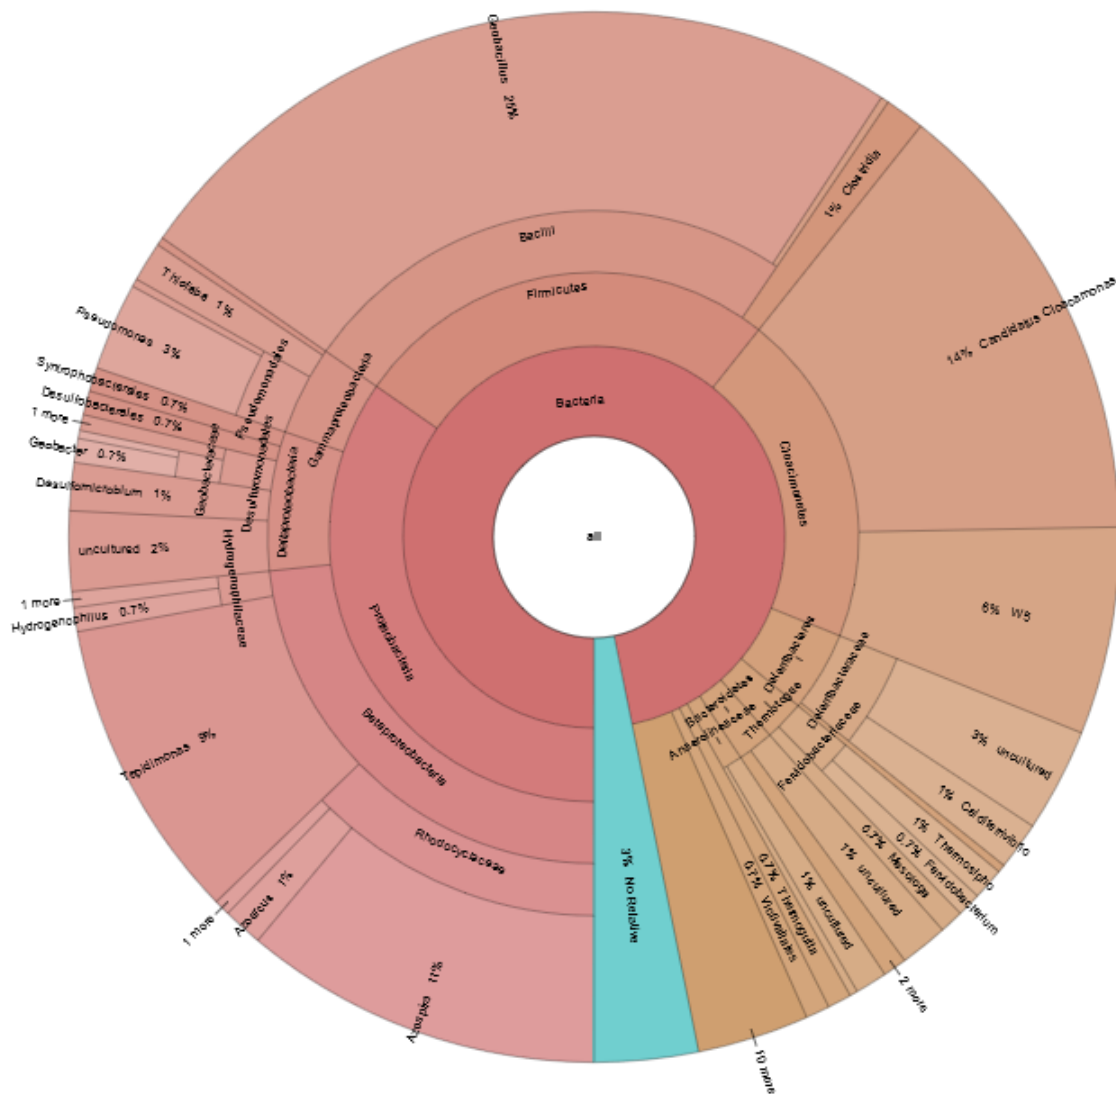

**Supplementary Figure S4.** Diversity of 16S rRNA genes of *Archaea* (DA library, A) and *Bacteria* (DB (B) and DP (C) libraries) in DNA-derived libraries; diversity of cDNA of 16S rRNA sequences of *Bacteria* in RNA-derived library RB (D); and total bacterial diversity in DB, DP and RB libraries (E). Analyses were performed on the base of SILVAngs pipeline (December 2006).
